# Supplementary material for: Markers of Oxidative Stress in the Exhaled Breath Condensate of Workers Handling Nanocomposites
Source: Nanomaterials (Basel). 2018 Aug 10;8(8):611. doi: 10.3390/nano8080611 (PMC6116291; doi:10.3390/nano8080611)
Supplement: Supplementary file 1 [file nanomaterials-08-00611-s001.pdf]

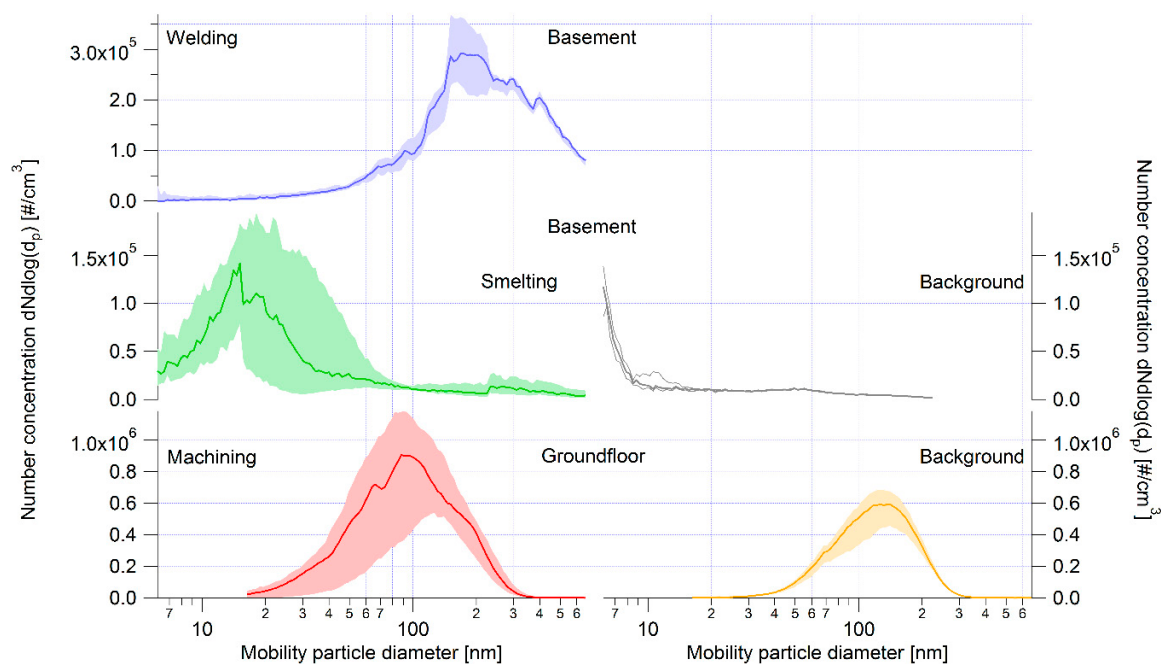

**Figure S1.** Particle number size distributions during welding, smelting, and machining (grinding and milling), and corresponding backgrounds measured by SMPS; solid line represents median for the measurement period and the corresponding shaded area shows interquartile span.

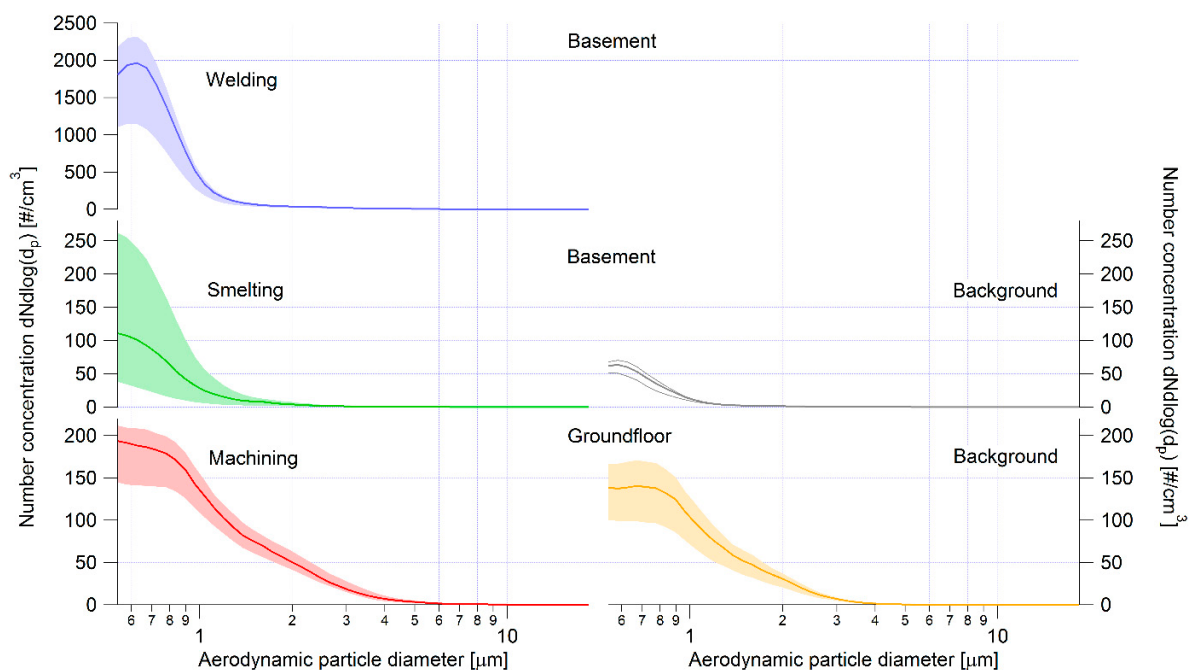

**Figure S2.** Particle number size distributions during welding, smelting, and machining (grinding and milling), and corresponding backgrounds measured by APS; solid line represents median for the measurement period and the corresponding shaded area shows interquartile span.

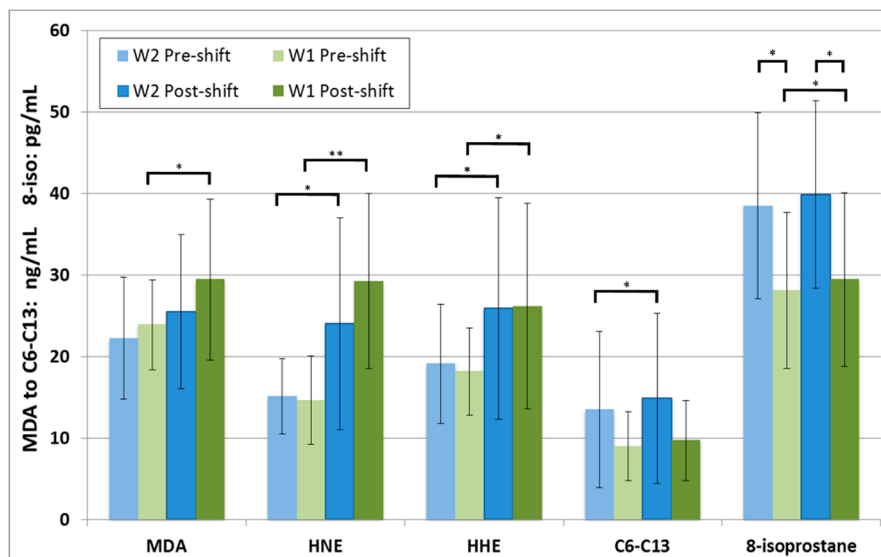

**Figure S3.** Markers of oxidation of lipids in the subgroups of 11 nanocomposites workers from workshop 1 (welding and smelting) and 8 from workshop 2 (machining) in pre-shift and post-shift samples). \*(p<0.05) \*\*(p<0.01) MDA=malondialdehyde, HNE=4-hydroxy-trans-nonanal, HHE=4-hydroxy-trans-hexenal, C6-13=aldehydes C6-C13, 8-isoprostane=8-isoProstaglandin F2 $\alpha$ .

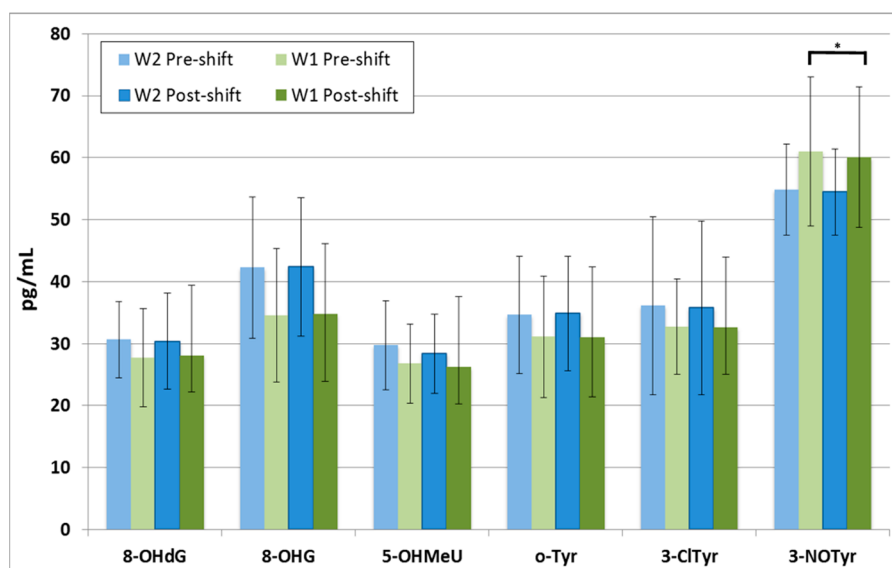

**Figure S4.** Markers of oxidation of nucleic acids and proteins in the subgroups of 11 nanocomposites workers from workshop 1 (welding and smelting) and 8 from workshop 2 (machining) in pre-shift and post-shift samples. \*(p<0.05), 8-OHdG=8-hydroxy-2-deoxyguanosine, 8-OHG=8-hydroxyguanosine, 5-OHMeU=5-hydroxymethyl uracil, o-Tyr=o-tyrosine, 3-CTyr=3-chlorotyrosine, 3-NOTyr=3-nitrotyrosine.

**Table S1.** Number of aerosol samples collected in the workshops.

Note: The online instruments were placed about 1.5 m from the workers in the height of approximately 1.5 m. The impactors were placed about 3 m from the individual processes in the height of approximately 1.5 m.

| Process                | Number of samples |          |
|------------------------|-------------------|----------|
|                        | SMPS/APS          | Impactor |
| Workshop 1 -Welding    | 28                | 1        |
| Workshop 1 - Smelting  | 32                | 1        |
| Workshop 2 - Machining | 39                | 1        |
| Workshop 1 Background  | 5                 | 0        |
| Workshop 2 Background  | 5                 | 0        |

**Table S2.** Correlations of the levels of different marker in the pre-shift or post-shift samples.

|                                                        | Correlation | p-value |
|--------------------------------------------------------|-------------|---------|
| <b>Pre-shift markers with other Pre-shift markers</b>  |             |         |
| 1 MDA with 1 C6-C13                                    | 0.474       | 0.040   |
| 1MDA with 1 5-OHMeU                                    | -0.610      | 0.006   |
| 1 HNE with 1 HHE                                       | 0.514       | 0.024   |
| 1 HHE with 1 8OHG                                      | 0.501       | 0.029   |
| 1 8-isoprostane with 1 C6-C13                          | 0.460       | 0.047   |
| 1 8-OHdG with 1 8OHG                                   | 0.800       | 0.000   |
| 1 8-OHdG with 1 5-OHMeU                                | 0.761       | 0.000   |
| 1 8-OHdG with 1 o-Tyr                                  | 0.686       | 0.001   |
| 1 8-OHdG with 1 3-ClTyr                                | 0.701       | 0.000   |
| 1 8 OHG with 1 5-OHMeU                                 | 0.563       | 0.012   |
| 1 8-OHG with 1 o-Tyr                                   | 0.634       | 0.004   |
| 1 8-OHG with 1 3-ClTyr                                 | 0.799       | 0.000   |
| 1 5-OHMeU with 1 o-Tyr                                 | 0.820       | 0.000   |
| 1 5-OHMeU with 1 3-ClTyr                               | 0.692       | 0.001   |
| 1 o-Tyr with 1 3-ClTyr                                 | 0.625       | 0.004   |
| <b>Pre-shift markers with other Post-shift markers</b> |             |         |
| 2-HNE with 1 MDA                                       | 0.715       | 0.001   |
| 2 HNE with 1 HHE                                       | 0.594       | 0.007   |
| 2-HHE with 1-MDA                                       | 0.578       | 0.010   |
| 2-HHE with 1 8-OHG                                     | 0.615       | 0.005   |
| 2 C6-C13 with 1 MDA                                    | 0.478       | 0.038   |
| 2 C6-C13 with 1 8-isoprostane                          | 0.460       | 0.047   |
| 2 8-isoprostane with 1 C6-C13                          | 0.493       | 0.032   |
| 2 8-OHdG with 1 HHE                                    | -0.482      | 0.037   |
| 2 8-OHG with 1 HHE                                     | 0.486       | 0.035   |
| 2 8-OHG with 1 8-OHdG                                  | 0.794       | 0.000   |
| 2 8-OHG with 1 5-OHMeU                                 | 0.564       | 0.012   |
| 2 8-OHG with 1 o-Tyr                                   | 0.645       | 0.003   |
| 2 8-OHG with 1 3-ClTyr                                 | 0.796       | 0.000   |
| 2 5-OHMeU with 1 HHE                                   | -0.470      | 0.042   |
| 2 o-Tyr with 1 8-OHdG                                  | 0.689       | 0.001   |
| 2 o-Tyr with 1 8-OHG                                   | 0.628       | 0.004   |

|                                                         |        |       |
|---------------------------------------------------------|--------|-------|
| 2 o-Tyr with 1 5-OHMeU                                  | 0.846  | 0.012 |
| 2 o-Tyr with 1 3-ClTyr                                  | 0.642  | 0.003 |
| 2 3-ClTyr with 1 8-OHdG                                 | 0.696  | 0.001 |
| 2 3-ClTyr with 1 8-OHG                                  | 0.783  | 0.000 |
| 2 3-ClTyr with 1 5-OHMeU                                | 0.706  | 0.001 |
| 2 3-ClTyr with 1 o-Tyr                                  | 0.628  | 0.004 |
| <b>Post-shift markers with other Post-shift markers</b> |        |       |
| 2 MDA with 2 HNE                                        | 0.790  | 0.000 |
| 2 MDA with 2 HHE                                        | 0.684  | 0.001 |
| 2 HNE with 2 HHE                                        | 0.790  | 0.000 |
| 2 HHE with 2 8-OHG                                      | 0.604  | 0.006 |
| 2 HHE with 2 5-OHMeU                                    | -0.476 | 0.039 |
| 2 C6-C13 with 8-isoprostane                             | 0.488  | 0.034 |
| 2 8-OHdG with 2 5-OHMeU                                 | 0.809  | 0.000 |
| 2 OHG with 2 o-Tyr                                      | 0.642  | 0.003 |
| 2 OHG with 2 3-ClTyr                                    | 0.781  | 0.000 |
| 2 o-Tyr with 2 3-ClTyr                                  | 0.648  | 0.003 |
